# Supplementary material for: A self-powered triboelectric nanosensor for detecting the corrosion state of magnesium treated by micro-arc oxidation
Source: Royal Society of Chemistry journal article supplement (doi:10.1039/c8ra10398d), 2019-01-01

### S1. SEM images including aperture measurement of the surface of MAO-Mg sheets

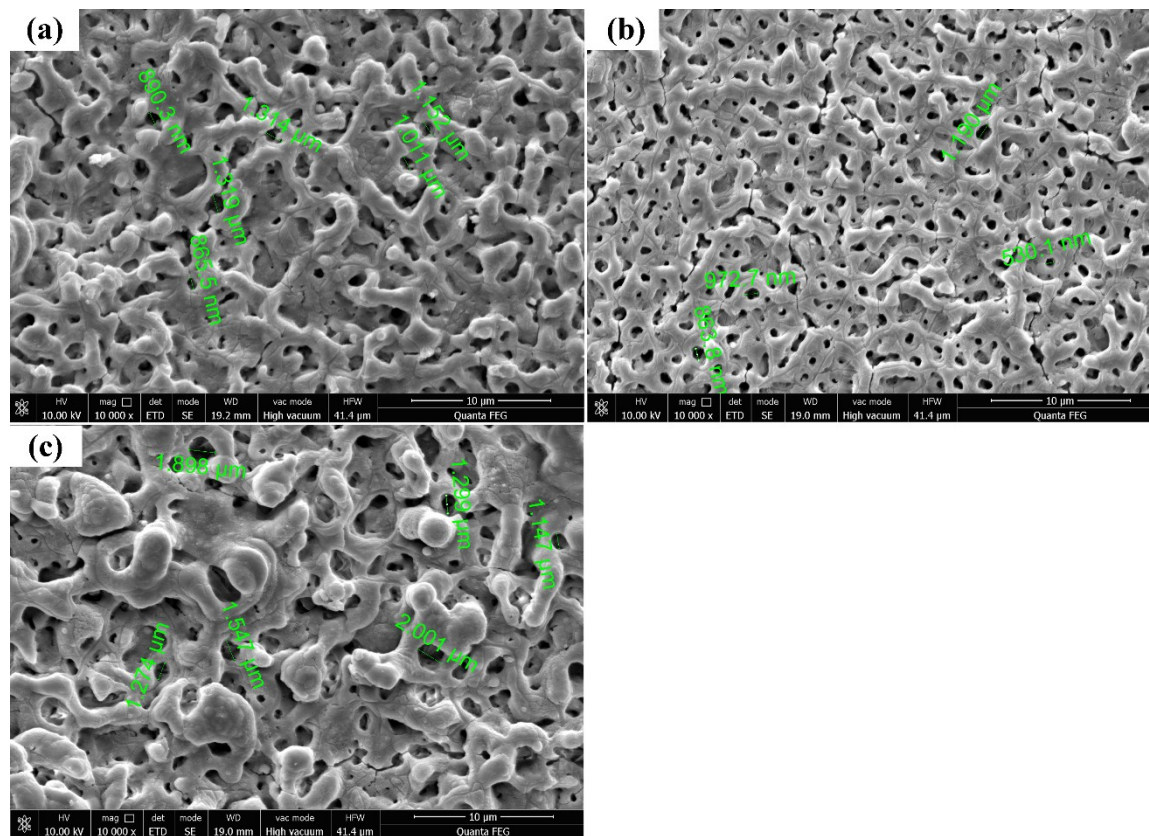

Fig. 1 SEM images of the surface of MAO-Mg sheets under different MAO voltage (frequency was 600 Hz): (a) 300 V; (b) 350 V; (c) 400 V

(They are consistent with Figure 2 (b-d))

**Conclusion:** After removing the maximum and minimum values, the average aperture is about 1.017 μm, 918.25 nm and 1.504 μm in turn. Thus, the most dense and uniform pore structure was obtained at 350 V under 600 Hz.

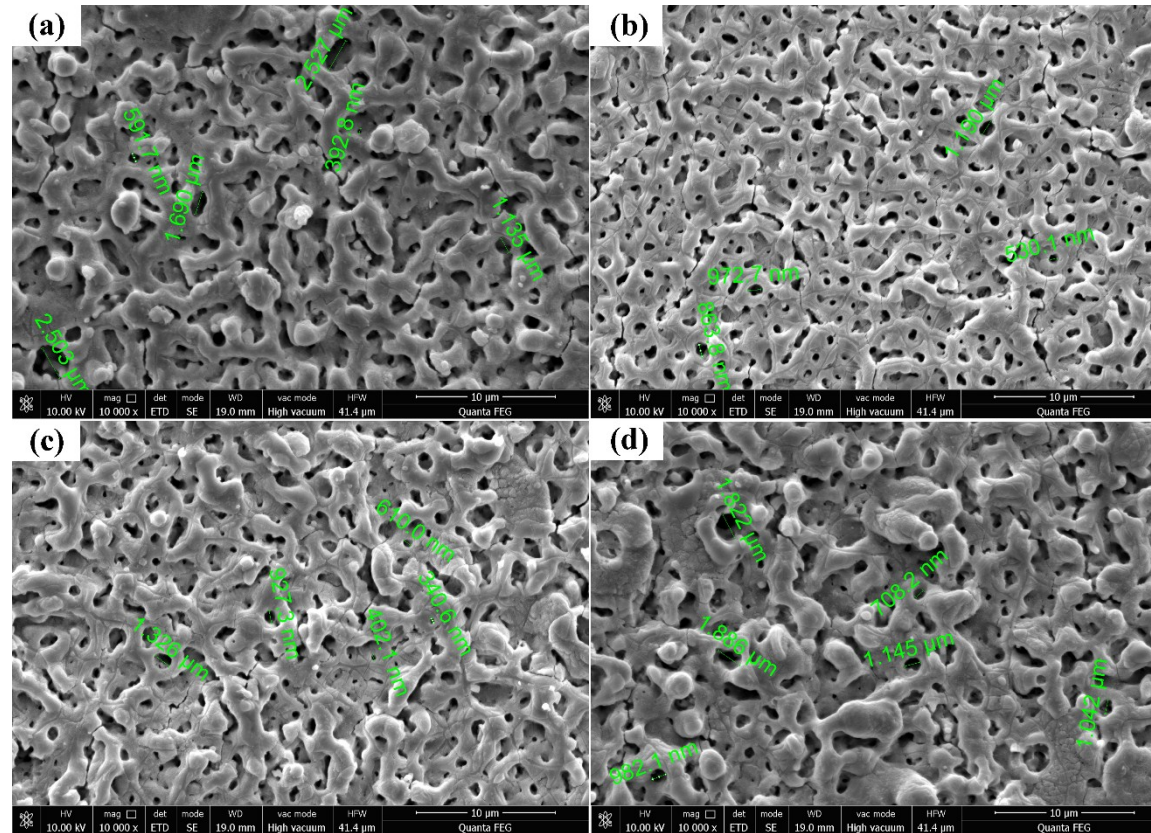

Fig. 2 SEM images of the surface of MAO-Mg sheets under different MAO voltage (voltage was 350 V): (a) 400 Hz; (b) 600 Hz; (c) 800 Hz; (d) 1000 Hz

(They are consistent with Figure 3 (b-e))

**Conclusion:** After removing the maximum and minimum values, the average aperture is about 1.409 μm, 918.25 nm, 646.4 nm and 1.247 μm in turn. Thus, the most dense and uniform pore structure was obtained at 800 Hz under the optimal voltage of 350 V.

S2. The original EDS analysis

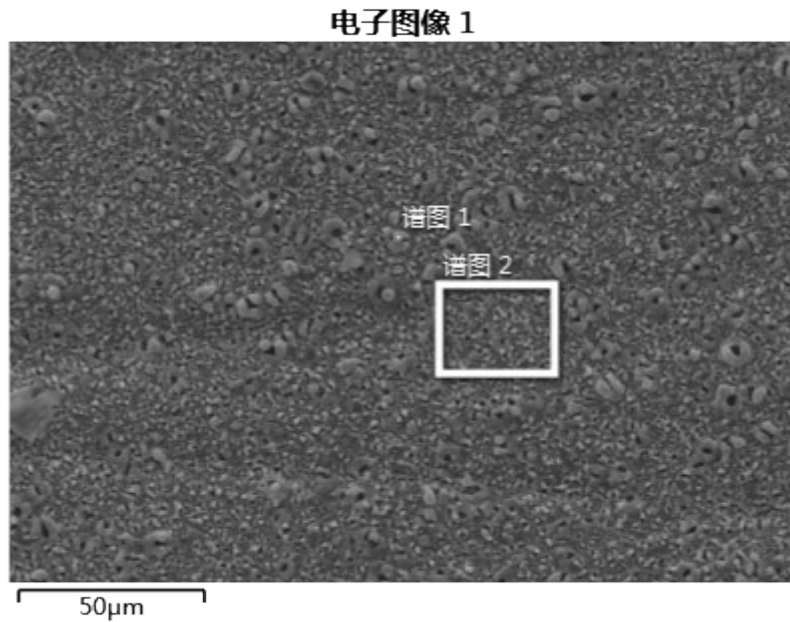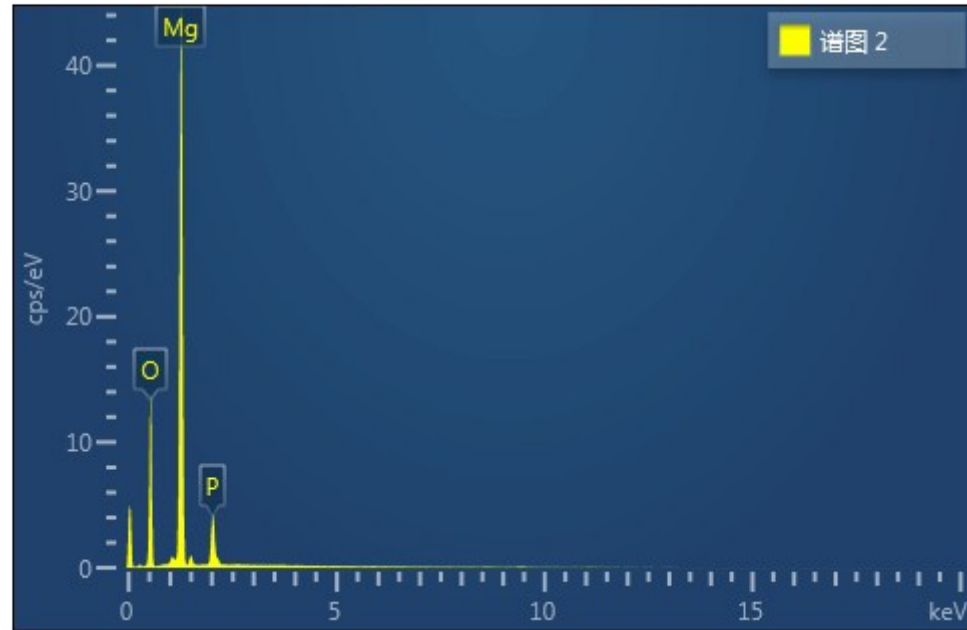

| 元素  | 线类型  | 表观浓度  | k 比值    | wt%    | wt% Sigma | 原子百分比  | 标准样品标签 | 厂家标准 | 标准样品标定日期 |
|-----|------|-------|---------|--------|-----------|--------|--------|------|----------|
| O   | K 线系 | 61.65 | 0.20746 | 41.29  | 0.20      | 52.32  | SiO2   | 是    |          |
| Mg  | K 线系 | 57.51 | 0.38143 | 51.61  | 0.19      | 43.03  | MgO    | 是    |          |
| P   | K 线系 | 8.32  | 0.04653 | 7.10   | 0.10      | 4.65   | GaP    | 是    |          |
| 总量: |      |       |         | 100.00 |           | 100.00 |        |      |          |

电子图像 2

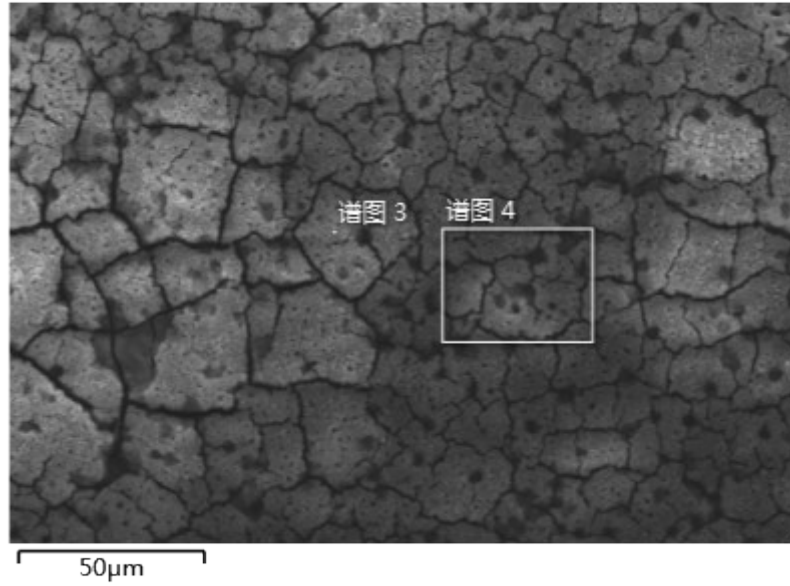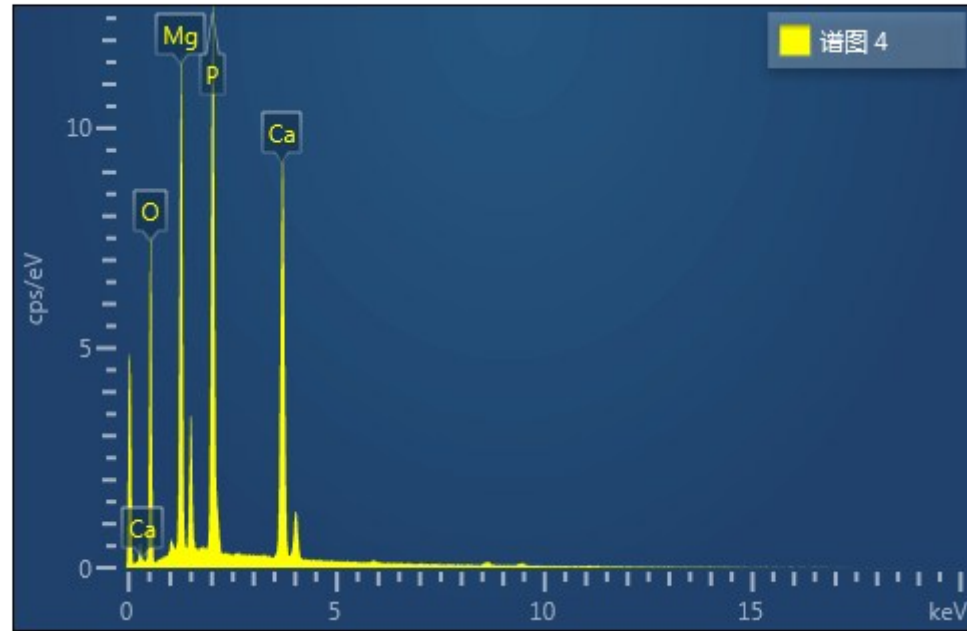

| 元素  | 线类型  | 表观浓度  | k 比值    | wt%    | wt% Sigma | 原子百分比  | 标准样品标签       | 厂家标准 | 标准样品标定日期 |
|-----|------|-------|---------|--------|-----------|--------|--------------|------|----------|
| O   | K 线系 | 38.20 | 0.12855 | 47.21  | 0.26      | 63.33  | SiO2         | 是    |          |
| Mg  | K 线系 | 16.68 | 0.11062 | 16.28  | 0.13      | 14.37  | MgO          | 是    |          |
| P   | K 线系 | 29.30 | 0.16387 | 17.49  | 0.13      | 12.12  | GaP          | 是    |          |
| Ca  | K 线系 | 24.32 | 0.21732 | 19.03  | 0.14      | 10.19  | Wollastonite | 是    |          |
| 总量: |      |       |         | 100.00 |           | 100.00 |              |      |          |

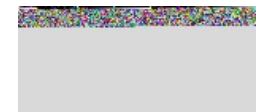

电子图像 3

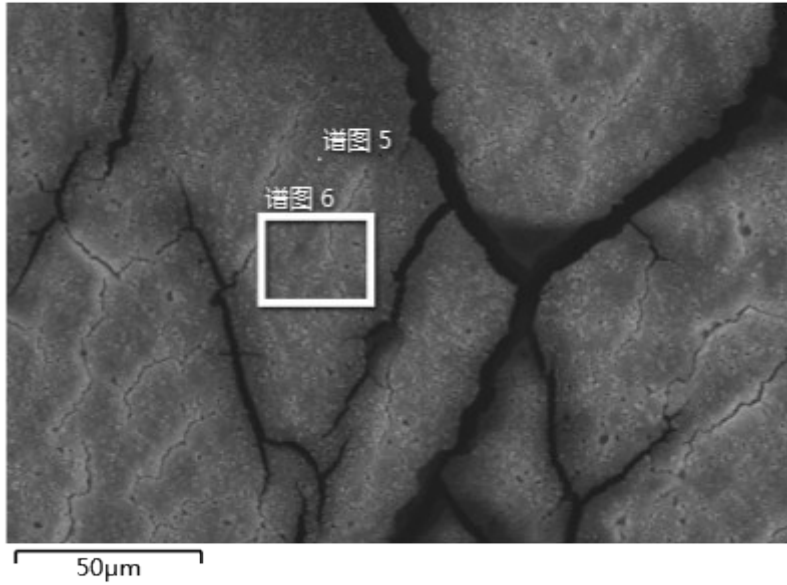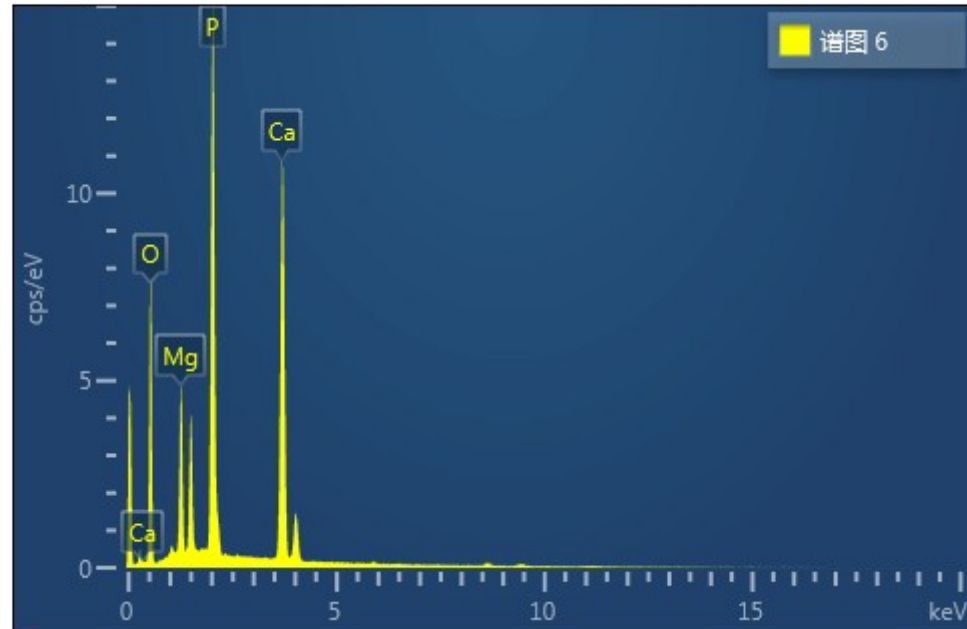

| 元素  | 线类型  | 表观浓度  | k 比值    | wt%    | wt% Sigma | 原子百分比  | 标准样品标签       | 厂家标准 | 标准样品标定日期 |
|-----|------|-------|---------|--------|-----------|--------|--------------|------|----------|
| O   | K 线系 | 39.93 | 0.13438 | 51.79  | 0.26      | 68.95  | SiO2         | 是    |          |
| Mg  | K 线系 | 6.95  | 0.04608 | 7.06   | 0.09      | 6.18   | MgO          | 是    |          |
| P   | K 线系 | 34.69 | 0.19402 | 19.19  | 0.14      | 13.20  | GaP          | 是    |          |
| Ca  | K 线系 | 28.81 | 0.25746 | 21.96  | 0.15      | 11.67  | Wollastonite | 是    |          |
| 总量: |      |       |         | 100.00 |           | 100.00 |              |      |          |



电子图像 4

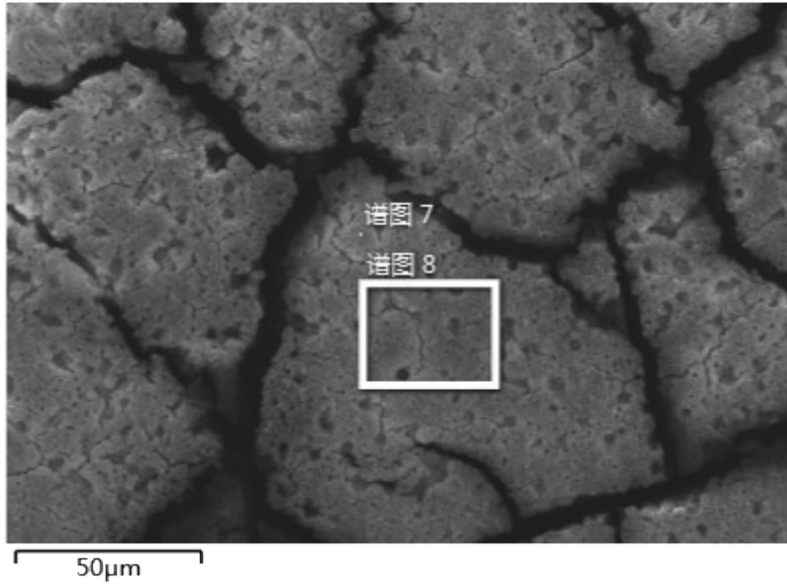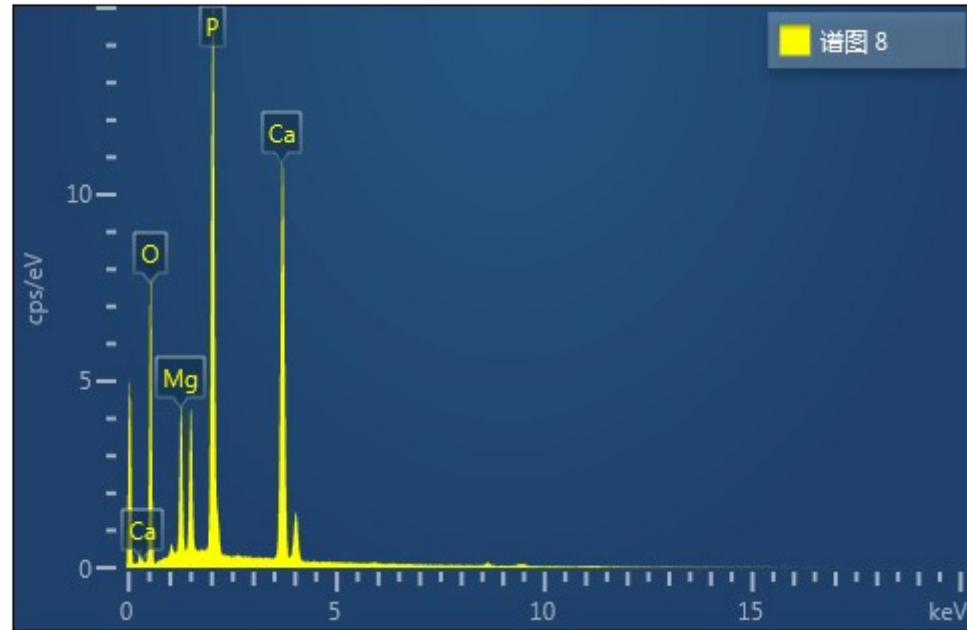

| 元素  | 线类型  | 表观浓度  | k 比值    | wt%    | wt% Sigma | 原子百分比  | 标准样品标签       | 厂家标准 | 标准样品标定日期 |
|-----|------|-------|---------|--------|-----------|--------|--------------|------|----------|
| O   | K 线系 | 40.02 | 0.13467 | 52.21  | 0.26      | 69.42  | SiO2         | 是    |          |
| Mg  | K 线系 | 6.26  | 0.04151 | 6.41   | 0.08      | 5.61   | MgO          | 是    |          |
| P   | K 线系 | 34.89 | 0.19513 | 19.31  | 0.14      | 13.26  | GaP          | 是    |          |
| Ca  | K 线系 | 28.84 | 0.25772 | 22.07  | 0.15      | 11.71  | Wollastonite | 是    |          |
| 总量: |      |       |         | 100.00 |           | 100.00 |              |      |          |



电子图像 5

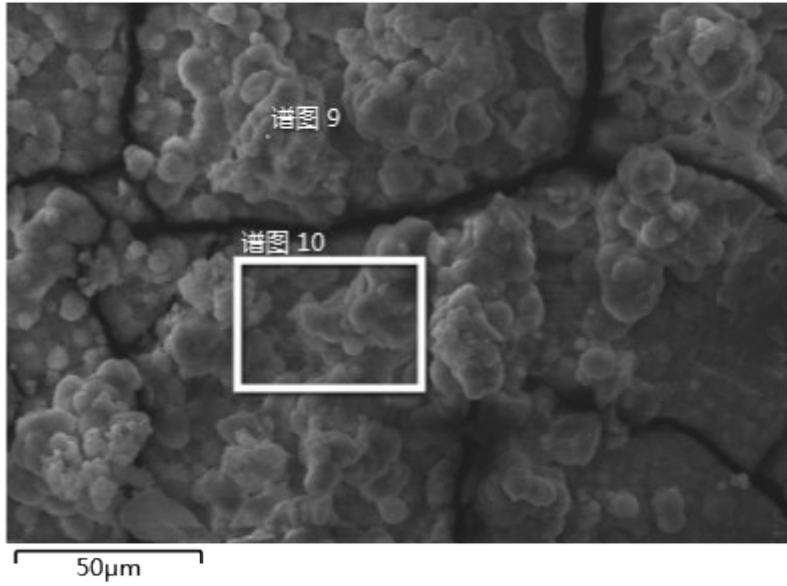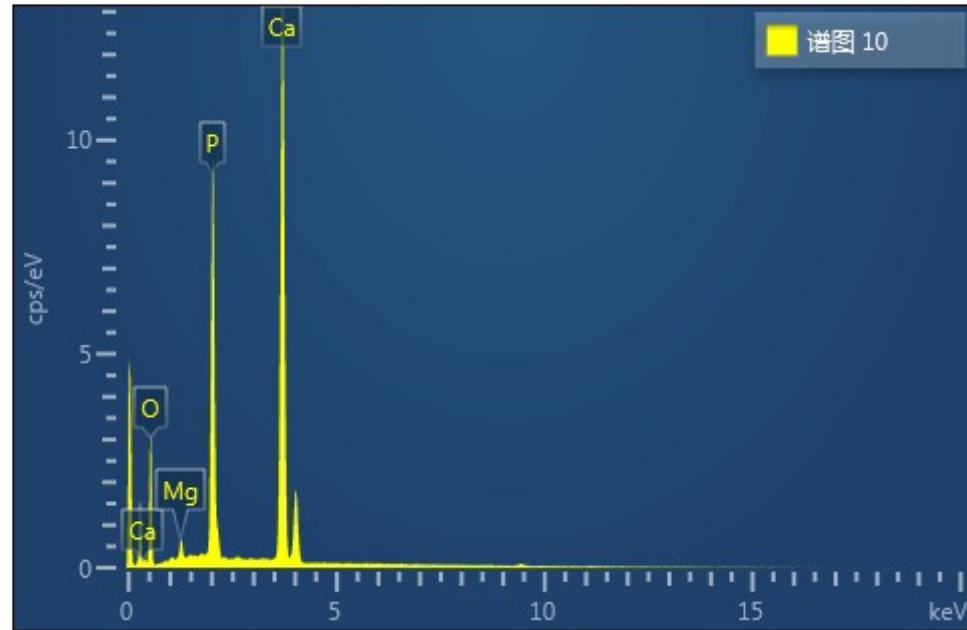

| 元素  | 线类型  | 表观浓度  | k 比值    | wt%    | wt% Sigma | 原子百分比  | 标准样品标签       | 厂家标准 | 标准样品标定日期 |
|-----|------|-------|---------|--------|-----------|--------|--------------|------|----------|
| O   | K 线系 | 21.96 | 0.07390 | 44.16  | 0.33      | 64.30  | SiO2         | 是    |          |
| Mg  | K 线系 | 0.89  | 0.00591 | 1.02   | 0.05      | 0.98   | MgO          | 是    |          |
| P   | K 线系 | 29.33 | 0.16405 | 16.69  | 0.14      | 12.55  | GaP          | 是    |          |
| Ca  | K 线系 | 47.83 | 0.42733 | 38.14  | 0.25      | 22.17  | Wollastonite | 是    |          |
| 总量: |      |       |         | 100.00 |           | 100.00 |              |      |          |



电子图像 6

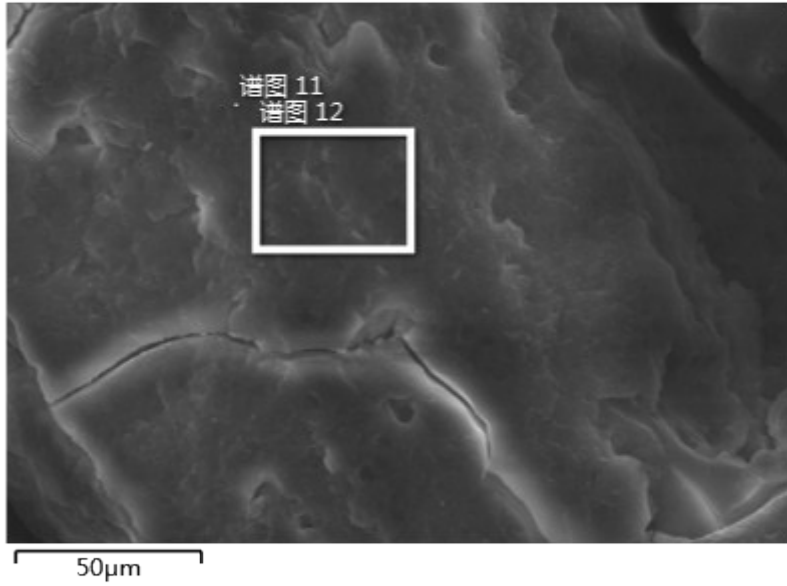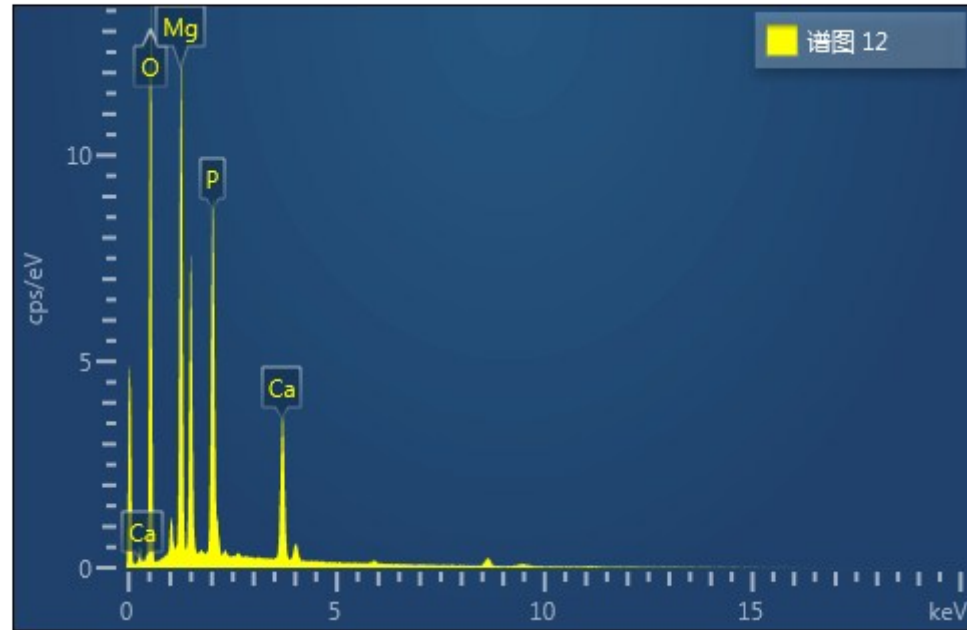

| 元素  | 线类型  | 表观浓度  | k 比值    | wt%    | wt% Sigma | 原子百分比  | 标准样品标签       | 厂家标准 | 标准样品标定日期 |
|-----|------|-------|---------|--------|-----------|--------|--------------|------|----------|
| O   | K 线系 | 72.93 | 0.24541 | 58.44  | 0.20      | 71.49  | SiO2         | 是    |          |
| Mg  | K 线系 | 19.53 | 0.12951 | 19.72  | 0.13      | 15.87  | MgO          | 是    |          |
| P   | K 线系 | 21.47 | 0.12008 | 13.72  | 0.11      | 8.67   | GaP          | 是    |          |
| Ca  | K 线系 | 10.04 | 0.08972 | 8.12   | 0.09      | 3.97   | Wollastonite | 是    |          |
| 总量: |      |       |         | 100.00 |           | 100.00 |              |      |          |





电子图像 7

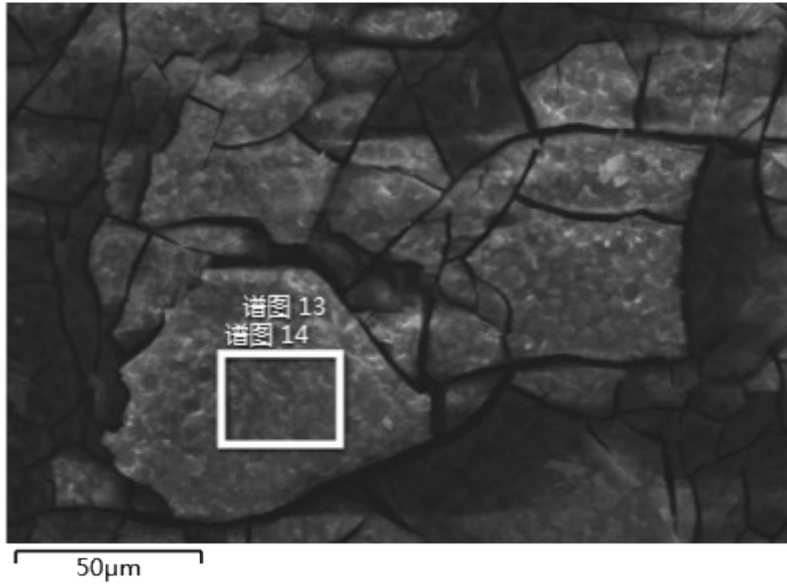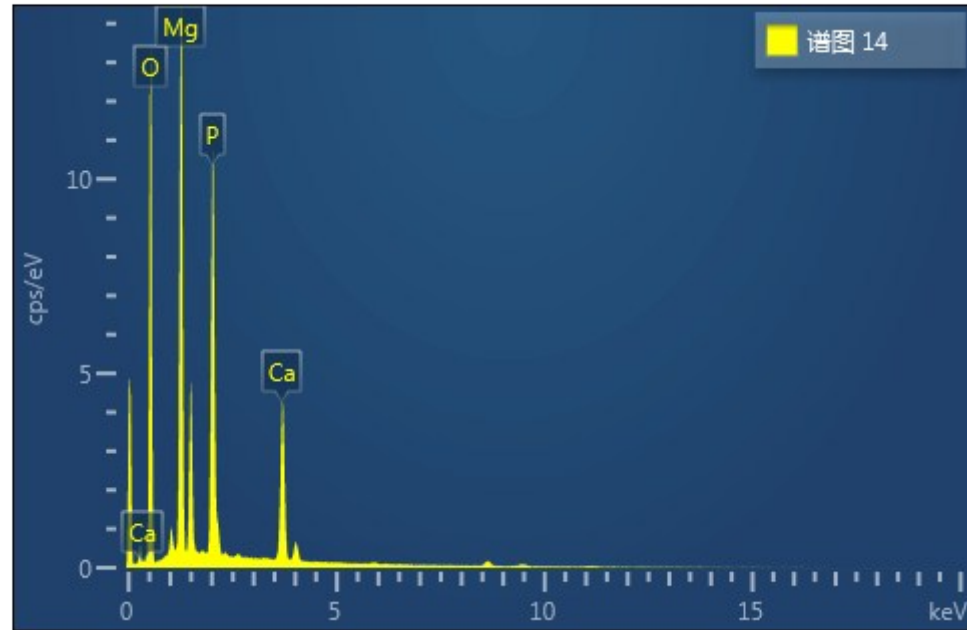

| 元素  | 线类型  | 表观浓度  | k 比值    | wt%    | wt% Sigma | 原子百分比  | 标准样品标签       | 厂家标准 | 标准样品标定日期 |
|-----|------|-------|---------|--------|-----------|--------|--------------|------|----------|
| O   | K 线系 | 71.22 | 0.23965 | 56.09  | 0.20      | 69.55  | SiO2         | 是    |          |
| Mg  | K 线系 | 21.84 | 0.14487 | 20.39  | 0.13      | 16.63  | MgO          | 是    |          |
| P   | K 线系 | 25.01 | 0.13986 | 14.97  | 0.12      | 9.59   | GaP          | 是    |          |
| Ca  | K 线系 | 11.24 | 0.10045 | 8.55   | 0.09      | 4.23   | Wollastonite | 是    |          |
| 总量: |      |       |         | 100.00 |           | 100.00 |              |      |          |



Supplement: c8ra10398d1.pdf [file c8ra10398d1.pdf]
